# Supplementary material
Source: publisher figshare collection journal article supplement (https://frontiersin.figshare.com/ndownloader/files/24548636)

## *Supplementary Material*

**Figure S1** The measurement setup with stiffness device (SD) and the two ultrasonic distance sensors

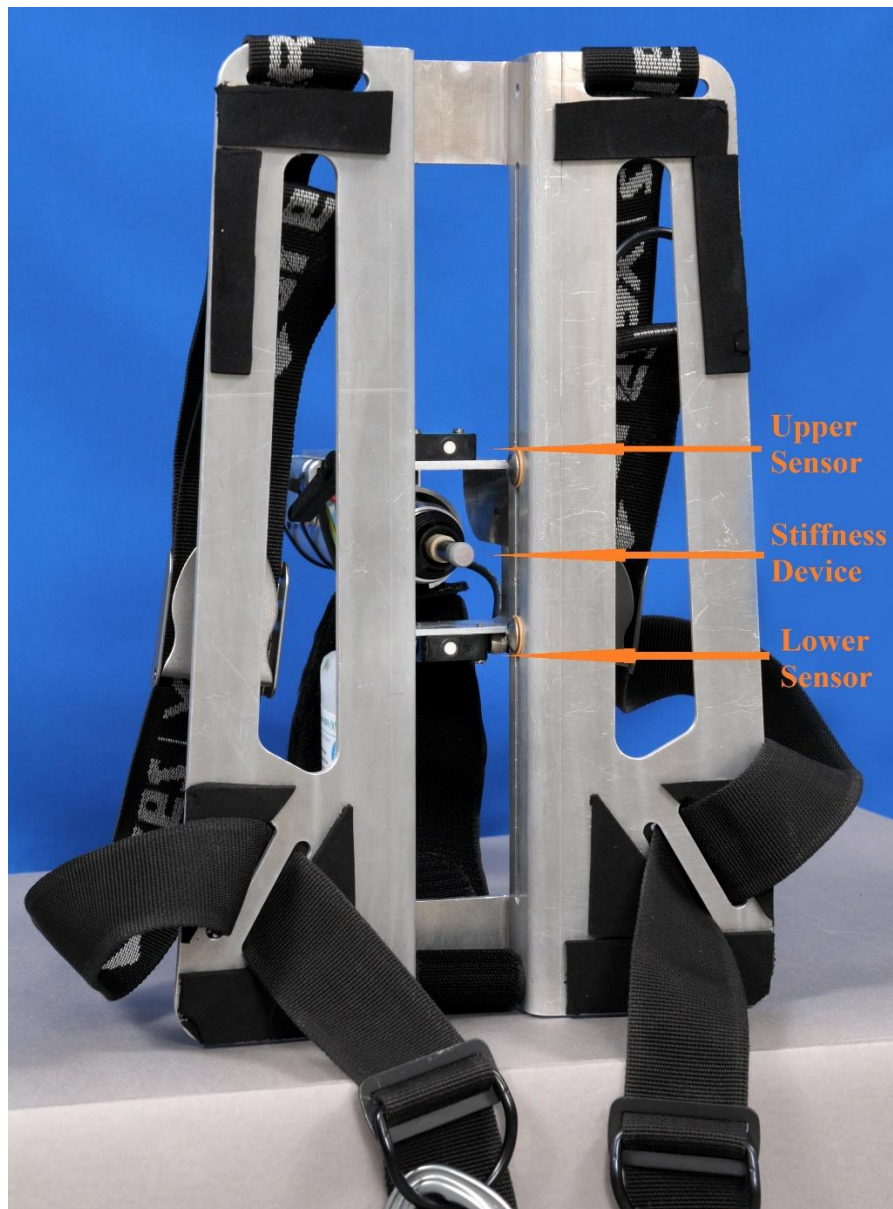

**Figure S2** Placement of the electrode's at erector spinea and multifidus muscle

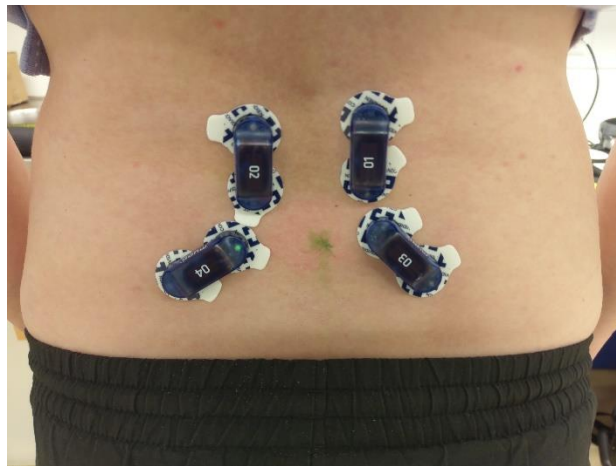

**Figure S3** Placement of the electrodes at transversus abd. and iliopsoas muscle

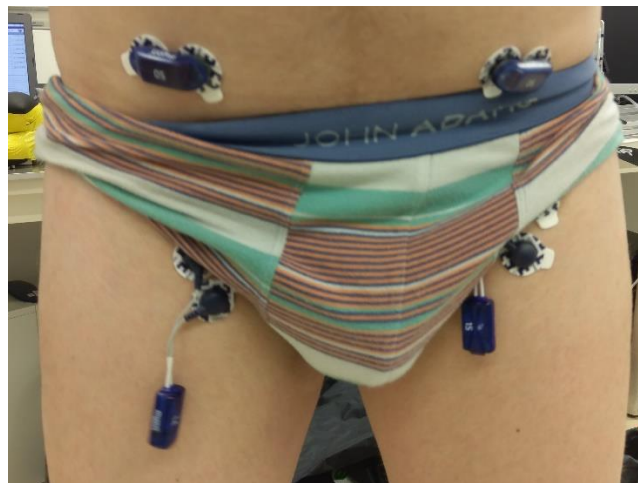

**Figure S4** An exemplar of EMG raw data

Representative Subject Nr. 7, Right Lumbar ES, Parabel 4

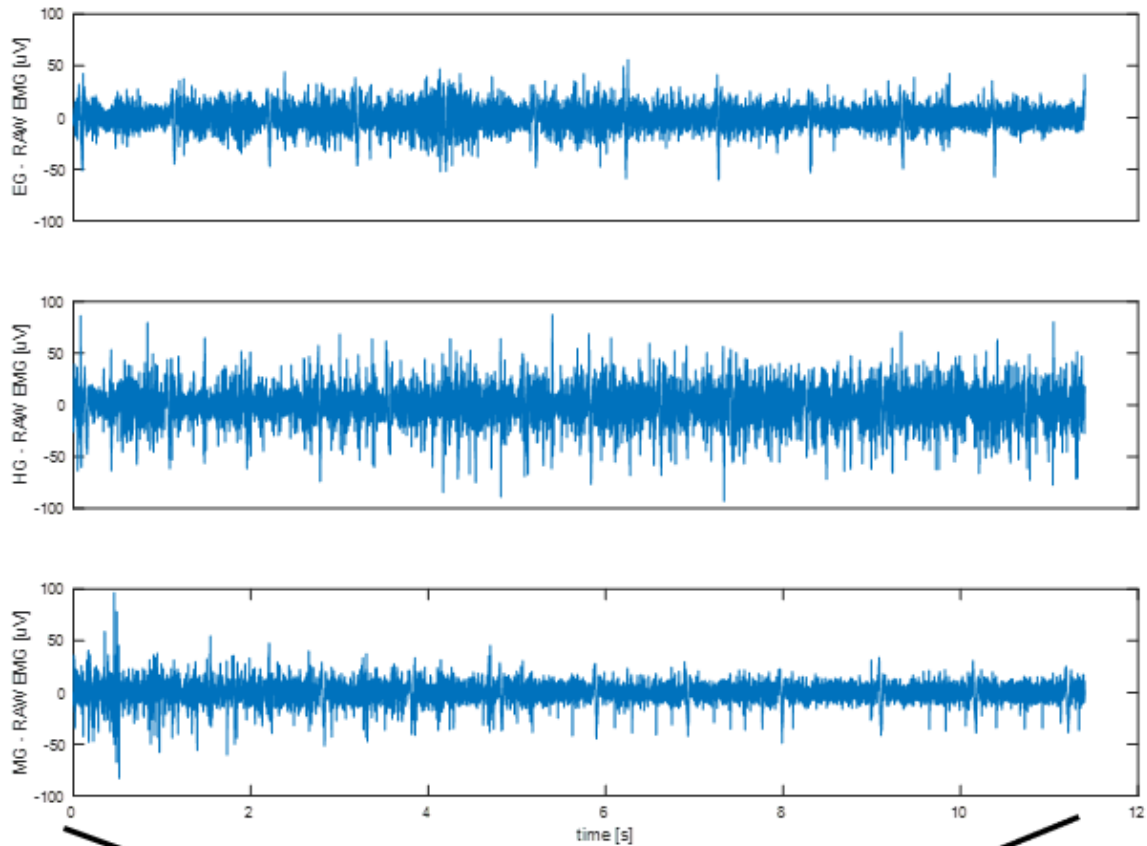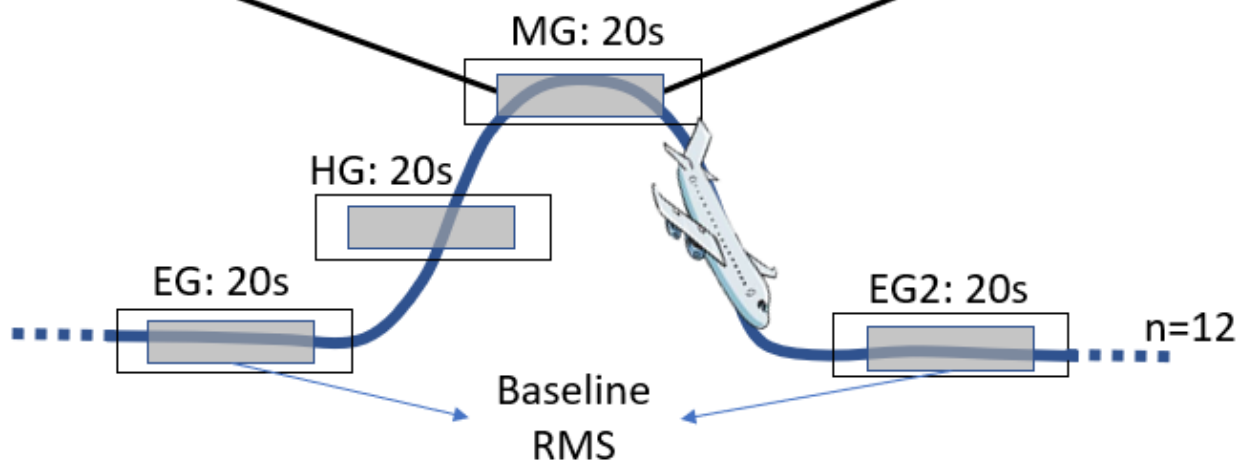

**Figure S5a** Change of erector spinea muscle activity due to change in conditions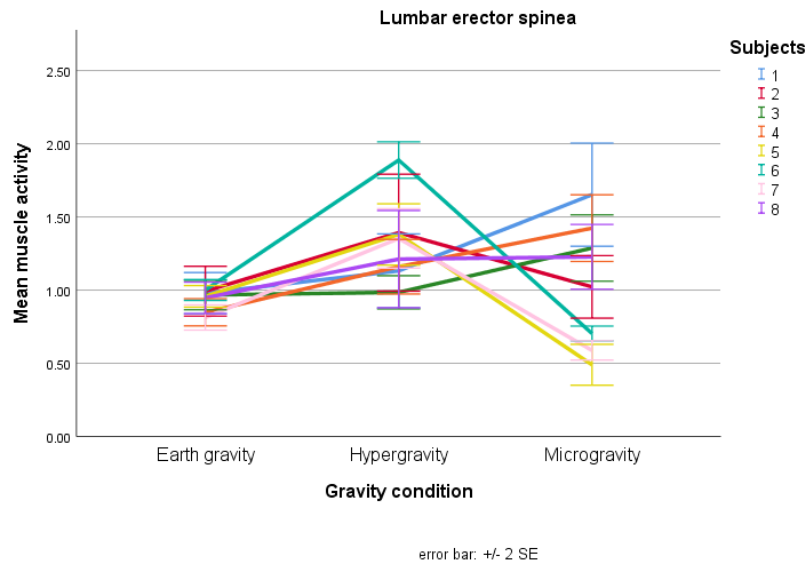**Figure S5b** Change of multifidi muscle activity due to change in conditions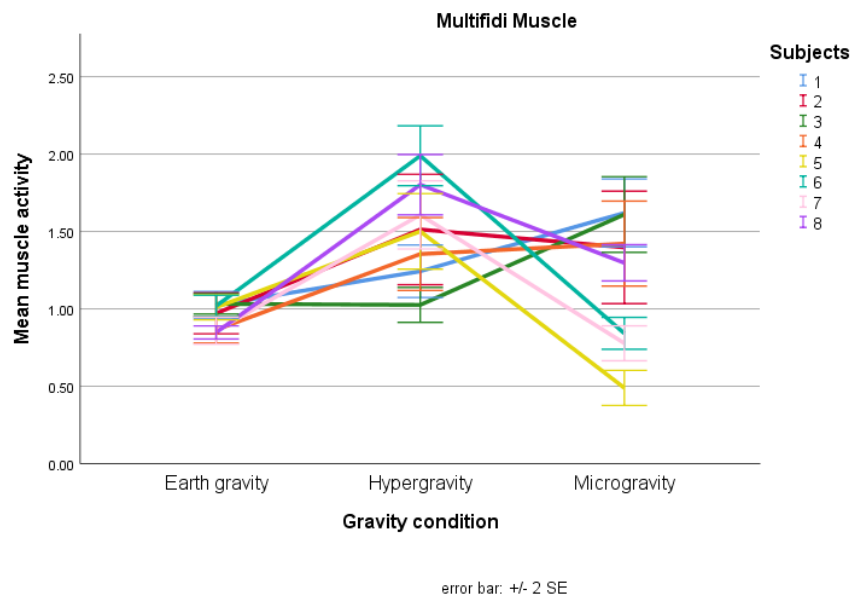**Figure S5c** Change of transversus abdominis muscle activity due to change in conditions

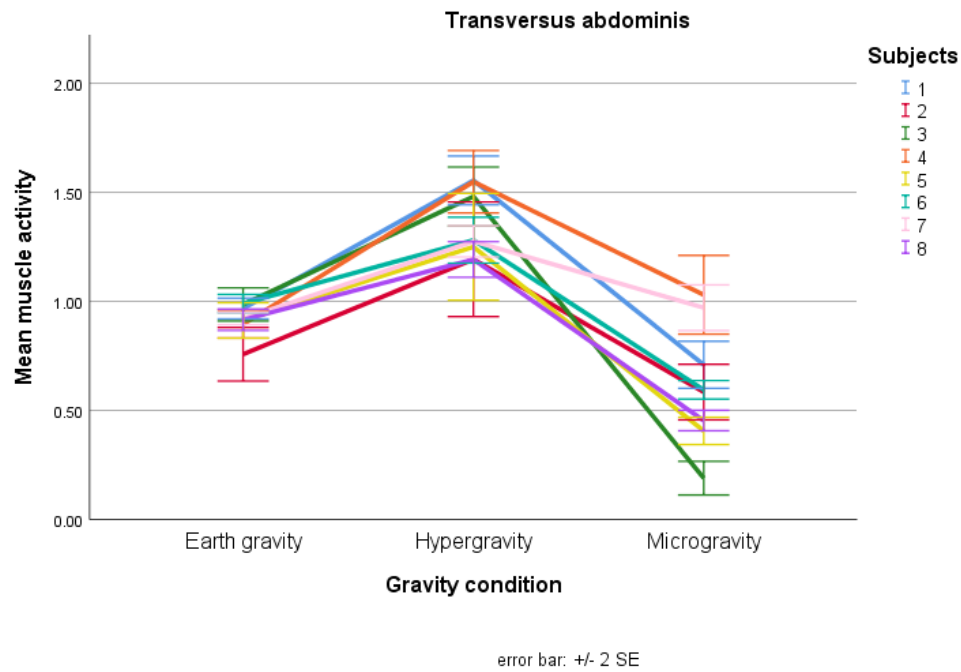

**Figure S5d** Change of psoas muscle activity due to change in conditions

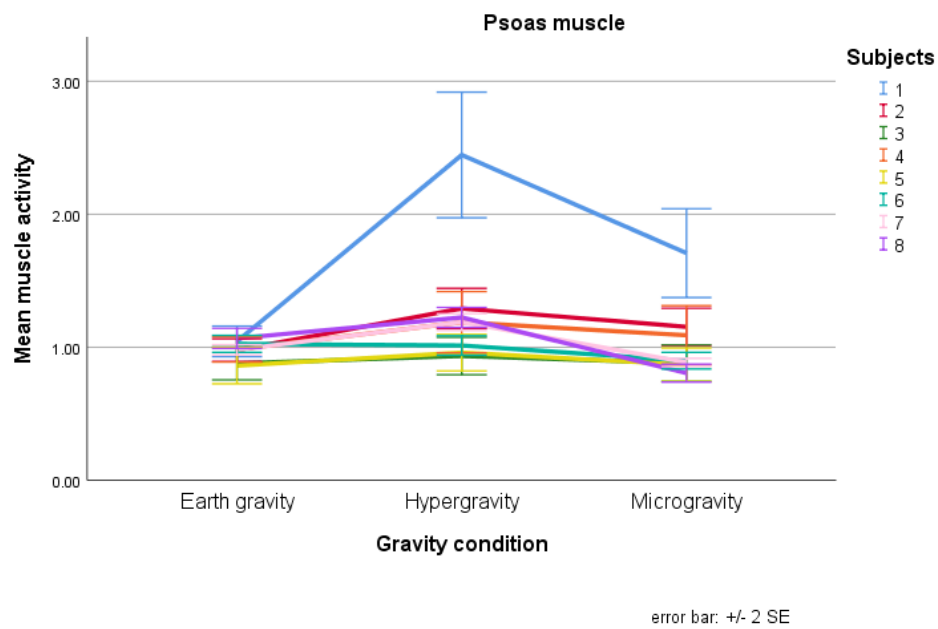

Supplement: Supplementary file [file 24548636]
